# Supplementary material for: Adsorption and Desorption Performance and Mechanism of Tetracycline Hydrochloride by Activated Carbon-Based Adsorbents Derived from Sugar Cane Bagasse Activated with ZnCl2
Source: PubMed Central journal article supplement (PMC6943745; doi:10.3390/molecules24244534), 2019-12-11
Supplement: molecules-24-04534-s001.pdf [file molecules-24-04534-s001.pdf]

## Supplementary Material

# Adsorption and desorption performance and mechanism of tetracycline hydrochloride by activated carbon-based adsorbents derived from sugar cane bagasse activated with $ZnCl_2$

Yixin Cai<sup>1,2</sup>, Liming Liu<sup>1,2</sup>, Huafeng Tian<sup>1,\*</sup>, Zhennai Yang<sup>1,\*</sup>, Xiaogang Luo<sup>1,2,3,\*</sup>

<sup>1</sup> *Beijing Advanced Innovation Center for Food Nutrition and Human Health, Beijing Technology & Business University (BTBU), Beijing, 100048, China*

<sup>2</sup> *School of Chemical Engineering and Pharmacy, Wuhan Institute of Technology, LiuFang Campus, No.206, Guanggu 1st road, Donghu New & High Technology Development Zone, Wuhan 430205, Hubei Province, PR China*

<sup>3</sup> *School of Materials Science and Engineering, Zhengzhou University, No.100 Science Avenue, Zhengzhou City, 450001, Henan Province, PR China*

---

\* Corresponding author: Xiaogang Luo, Professor, Ph.D.

School of Chemical Engineering and Pharmacy, Wuhan Institute of Technology, 693 Xiongchu Avenue, Wuhan 430073, Hubei, China

Tel.: +86-139-86270668;

Email: xgluo0310@hotmail.com; xgluo@wit.edu.cn (X. Luo)

Corresponding author: Zhennai Yang, Professor, Ph.D.

School of Food and Chemical Engineering, Beijing Technology and Business University, Beijing 100048, China

E-mail: yangzhennai@th.btbu.edu.cn (Z. Yang).

Corresponding author: Huafeng Tian, Professor, Ph.D.

School of Material and Mechanical Engineering, Beijing Technology and Business University, Beijing 100048, China

E-mail address: tianhuafeng@th.btbu.edu.cn (H. Tian).

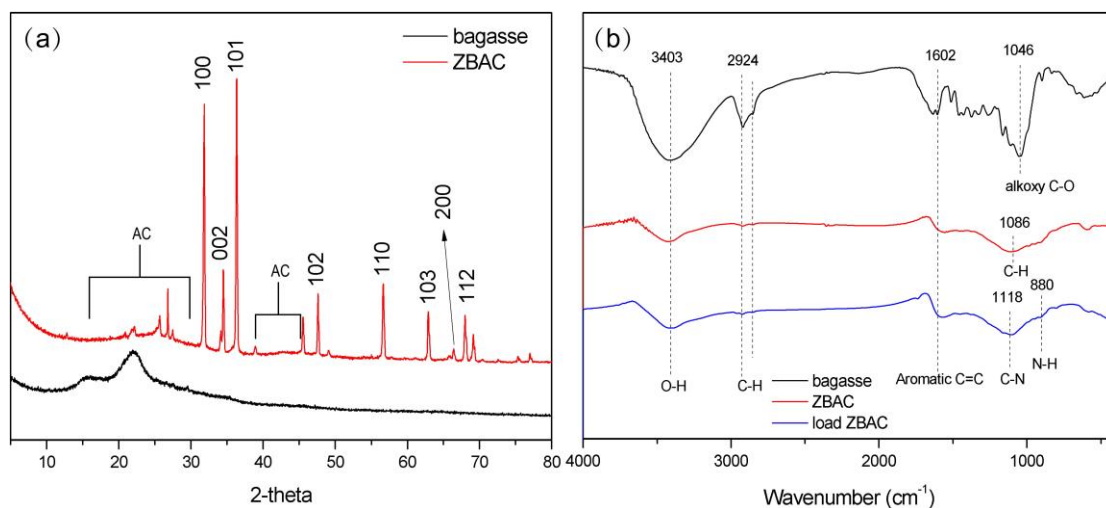

**Figure S1.** XRD patterns and FTIR of bagasse and ZBAC.

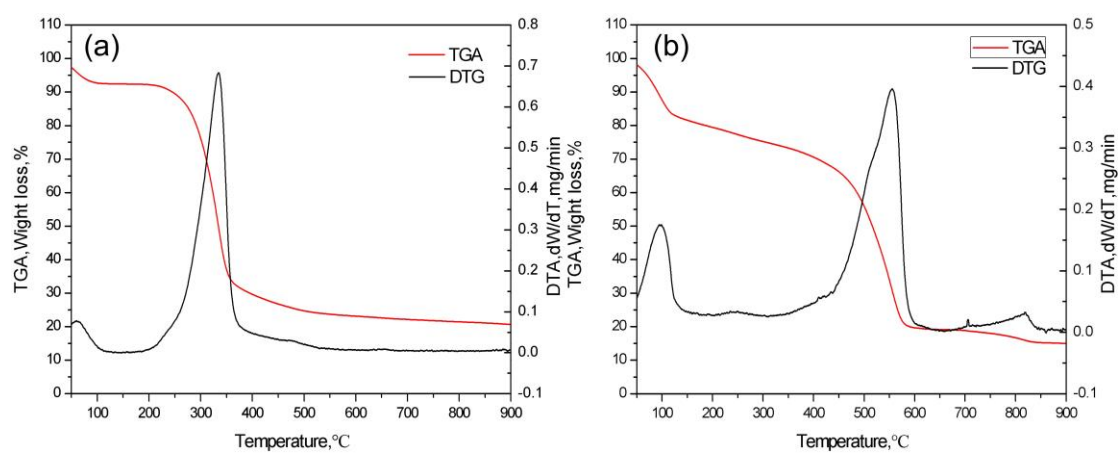

**Figure S2.** TGA/DTGA of bagasse and ZIB.

**Table S1.**  $S_{BET}$ ,  $D_p$  and  $V_{mic}$  of BAC and ZBAC.

| Samples | $S_{BET}$<br>( $m^2 g^{-1}$ ) | $D_p$<br>(nm) | $V_{mic}$<br>( $cm^3 g^{-1}$ ) |
|---------|-------------------------------|---------------|--------------------------------|
| BAC     | 376.08                        | 2.826         | 0.186                          |
| ZBAC    | 831.23                        | 2.519         | 0.453                          |

**Table S2.** Kinetic Parameters of TCH Removal onto ZBAC.

| Model I | $q_{e,exp}$        | $q_{e,cal}$        | $k_1$             | $R^2$  |
|---------|--------------------|--------------------|-------------------|--------|
|         | mg g <sup>-1</sup> | mg g <sup>-1</sup> | min <sup>-1</sup> |        |
| 298 K   | 23.818             | 21.505             | 0.116             | 0.8523 |
| 308 K   | 24.000             | 22.277             | 0.193             | 0.9481 |
| 318 K   | 24.000             | 23.070             | 0.262             | 0.9864 |

  

| Model II | $q_{e,exp}$        | $q_{e,cal}$        | $k_2$                                | $k_0$                                | $R^2$  |
|----------|--------------------|--------------------|--------------------------------------|--------------------------------------|--------|
|          | mg g <sup>-1</sup> | mg g <sup>-1</sup> | g mg <sup>-1</sup> min <sup>-1</sup> | g mg <sup>-1</sup> min <sup>-1</sup> |        |
| 298 K    | 23.818             | 22.232             | 0.011                                | 5.310                                | 0.9437 |
| 308 K    | 24.000             | 23.294             | 0.016                                | 8.524                                | 0.9106 |
| 318 K    | 24.000             | 24.765             | 0.020                                | 12.137                               | 0.9988 |

  

| Model ID | $q_{e,exp}$        | $k_i$                                  | C                  | $R^2$  |
|----------|--------------------|----------------------------------------|--------------------|--------|
|          | mg g <sup>-1</sup> | mg <sup>-1</sup> g min <sup>-1/2</sup> | mg g <sup>-1</sup> |        |
| 298 K    | 23.818             | 0.792                                  | 13.059             | 0.9083 |
| 308 K    | 24.000             | 0.884                                  | 14.922             | 0.9426 |
| 318 K    | 24.000             | 1.311                                  | 15.846             | 0.9136 |

**Table S3.**  $R_L$  values at various temperatures and initial concentrations.

| $R_L$ | 240 mg L <sup>-1</sup> | 300 mg L <sup>-1</sup> | 360 mg L <sup>-1</sup> | 420 mg L <sup>-1</sup> | 480 mg L <sup>-1</sup> |
|-------|------------------------|------------------------|------------------------|------------------------|------------------------|
| 298 K | 0.022                  | 0.018                  | 0.015                  | 0.013                  | 0.011                  |
| 308 K | 0.005                  | 0.004                  | 0.004                  | 0.003                  | 0.003                  |
| 318 K | 0.002                  | 0.001                  | 0.001                  | 0.001                  | 0.001                  |

**Table S4.** Constant parameter and correlation coefficients calculated for various adsorption models at different temperatures for TCH on ZBAC.

| Isotherm equation |                                                            | TCH    |        |        |
|-------------------|------------------------------------------------------------|--------|--------|--------|
|                   |                                                            | 298 K  | 308 K  | 318 K  |
| Langmuir          | $q_0$ (mg g <sup>-1</sup> )                                | 173.3  | 207.9  | 353.3  |
|                   | $K$ (L mg <sup>-1</sup> )                                  | 0.183  | 0.781  | 2.418  |
|                   | $R^2$                                                      | 0.8011 | 0.9499 | 0.9830 |
| Freundlich        | $k_f$                                                      | 73.82  | 148.9  | 276.7  |
|                   | $1/n$                                                      | 0.184  | 0.007  | 0.538  |
|                   | $R^2$                                                      | 0.9048 | 0.9070 | 0.9922 |
| DR                | $q_m$ (10 <sup>-3</sup> mol g <sup>-1</sup> )              | 0.707  | 2.381  | 15.13  |
|                   | $K'$ (10 <sup>-2</sup> mol <sup>2</sup> kJ <sup>-2</sup> ) | 1.550  | 2.010  | 2.741  |
|                   | $E$ (kJ mol <sup>-1</sup> )                                | 17.96  | 15.77  | 13.51  |
|                   | $R^2$                                                      | 0.9068 | 0.9961 | 0.9907 |

**Table S5.** Adams–Bohart, Thomas, Yoon–Nelson, BDST, Dose Response and Clark Model.

| Model          | Equation                                                                                                  | Parameters                           |                    |                      |     |
|----------------|-----------------------------------------------------------------------------------------------------------|--------------------------------------|--------------------|----------------------|-----|
|                |                                                                                                           | Unit                                 |                    |                      |     |
| Adams-Borhart  | $\frac{c_t}{c_0} = \frac{\exp(k_{AB}c_0t)}{\exp\left(\frac{k_{AB}N_0L}{v}\right) - 1 + \exp(k_{AB}c_0t)}$ | $k_{AB}$                             | $N_0$              | $v$                  |     |
|                |                                                                                                           | L mg <sup>-1</sup> min <sup>-1</sup> | mg L <sup>-1</sup> | cm min <sup>-1</sup> |     |
| Thomas         | $\frac{c_t}{c_0} = \frac{1}{1 + \exp\left[\left(\frac{k_{Th}}{Q}\right)(q_0M - c_0Qt)\right]}$            | $k_{Th}$                             | $q_0$              |                      |     |
|                |                                                                                                           | mL min <sup>-1</sup>                 | mg g <sup>-1</sup> |                      |     |
| Yoon-Nelson    | $\frac{c_t}{c_0} = \frac{\exp(k_{YN}t - \tau k_{NY})}{1 + \exp(k_{YN}t - \tau k_{NY})}$                   | $K_{YN}$                             | $T$                |                      |     |
|                |                                                                                                           | min <sup>-1</sup>                    | min                |                      |     |
| BDST           | $\frac{c_t}{c_0} = \frac{1}{1 + \exp\left[k_{BDST}c_0\left(\frac{N_0}{c_0v} - t\right)\right]}$           | $k_{BDST}$                           | $N_0$              | $v$                  | $L$ |
|                |                                                                                                           | L mg <sup>-1</sup>                   | mg L <sup>-1</sup> | cm min <sup>-1</sup> | cm  |
| Dose Responded | $\frac{c_t}{c_0} = 1 - \frac{1}{1 + \left(\frac{c_0Qt}{q_0M}\right)^a}$                                   | $\alpha$                             | $q_0$              |                      |     |
|                |                                                                                                           | -----                                | mg g <sup>-1</sup> |                      |     |
| Clark          | $\frac{c_t}{c_0} = \left(\frac{1}{1 + Ae^{-rt}}\right)^{\frac{1}{n-1}}$                                   | $A$                                  | $r$                |                      |     |
|                |                                                                                                           | -----                                | Min <sup>-1</sup>  |                      |     |
